# Supplementary material for: The gliotransmitter ACBP controls feeding and energy homeostasis via the melanocortin system
Source: JCI journal article supplement (doi:10.1172/jci123454), 2019-04-02

**Supplemental Figure 1: *Acbp* gene expression is dependent on the circadian time and nutritional status.** **A-** *Acbp* expression measured by qPCR in ARC microdissections of C57BL/6 WT male mice at different Zeitgeber times (ZT) (ZT0 corresponds to the onset of the light cycle in a 12 h light/dark cycle), \*\*  $p < 0.01$  compared to ZT6, One-way ANOVA with Bonferroni post hoc test, N=4-5. *Acbp* and *pomc* expression in ARC microdissections of fed or 16 h-fasted C57BL/6 WT male mice at **B-** ZT6 or **C-** ZT18, \*  $p < 0.05$  Student's *t*-test compared to controls, N=4-5. *Acbp* expression in ARC microdissections (ZT6) of WT male mice fed with a chow or high fat diet during **D-** 3 or 7 days or **E-** 42 days. N=4-8.

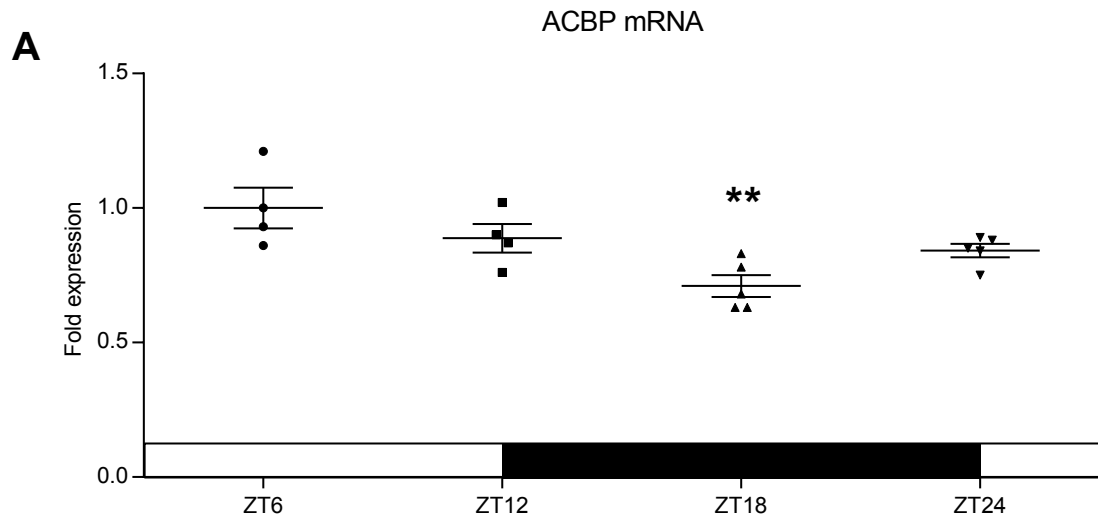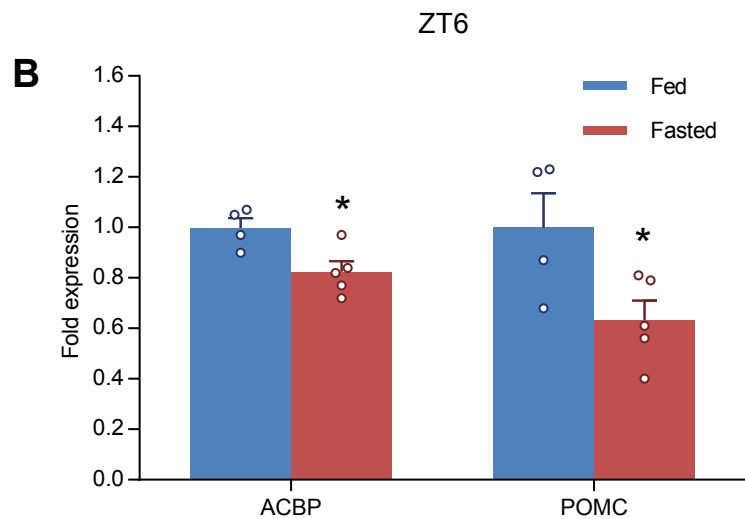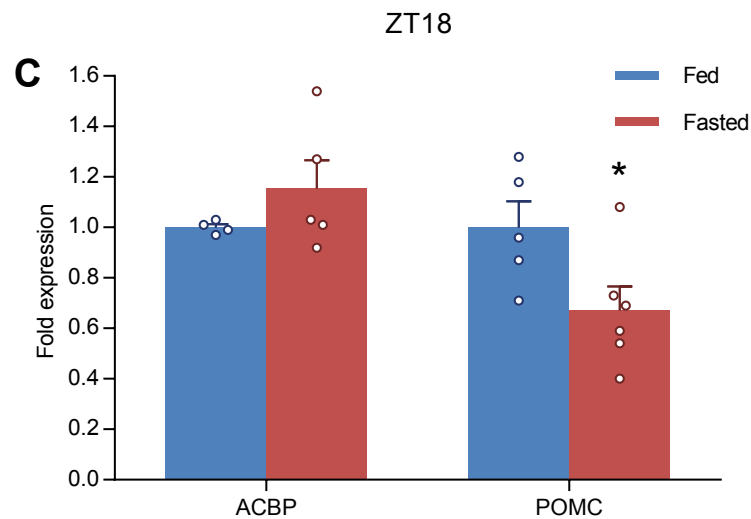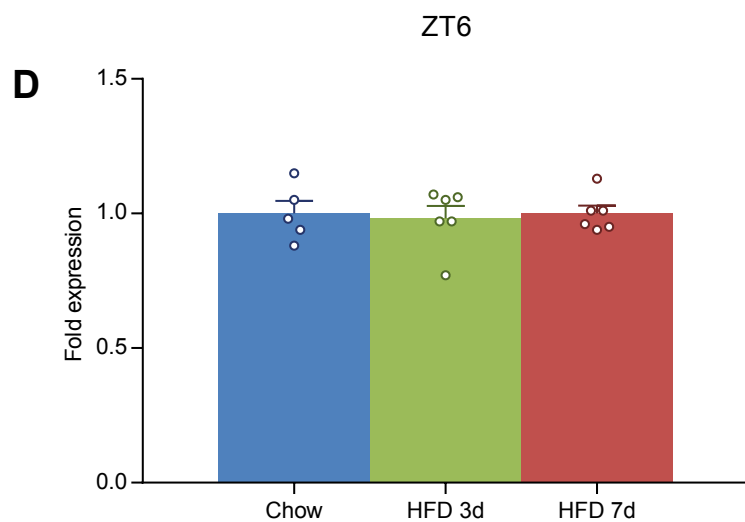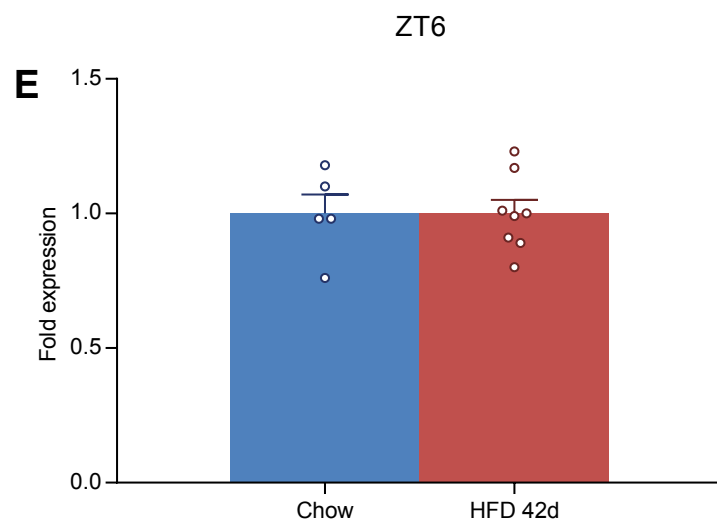

**Supplemental Figure 2: Pan-brain astroglial ACBP invalidation in male mice.** **A-** Immunostaining of ACBP (red) and GFAP (green) in *ACBP<sup>fllox/fllox</sup>* (WT) and *ACBP<sup>GFAP</sup>* KO mice. Scale bar represents 100  $\mu$ m. **B-** *Acbp* expression measured by qPCR in ARC microdissections from *ACBP<sup>GFAP</sup>* WT, HET and KO male mice fed with either chow (12 weeks) or HFD (16 weeks). \*\*\*  $p < 0.001$  compared to control littermates, One-way ANOVA followed by Bonferroni post hoc test, N=8. **C-** Body weight and **D-** cumulative food intake of *ACBP<sup>GFAP</sup>* WT, HET and KO male mice fed with chow. **E-** Energy expenditure (normalized to lean mass), **F-** RER and **G-** Locomotor activity measured in CLAMS metabolic cages during 48 h following 24 h acclimation, \*  $p < 0.05$ , \*\*  $p < 0.01$  compared to controls, Two-way ANOVA with Bonferroni post hoc test, N=8-10. **H-** 24 h food intake after a 16 h fast in *ACBP<sup>GFAP</sup>* WT and KO male mice receiving an ICV injection of PBS on day 1 and Leptin (1 $\mu$ g/2 $\mu$ l) on day 10, N=8-11. **I-** 24 h food intake in 2 h-fasted *ACBP<sup>GFAP</sup>* WT and KO male mice receiving an ICV injection of 4.5 % cyclodextrin HPB on day 1 and oleate (6 nmol/2 $\mu$ l) on day 10, N=8. \*  $p < 0.05$ , \*\*\*  $p < 0.001$  compared to vehicle injection, Two-way ANOVA repeated measures with Bonferroni post hoc test (each animal is used as its own control).

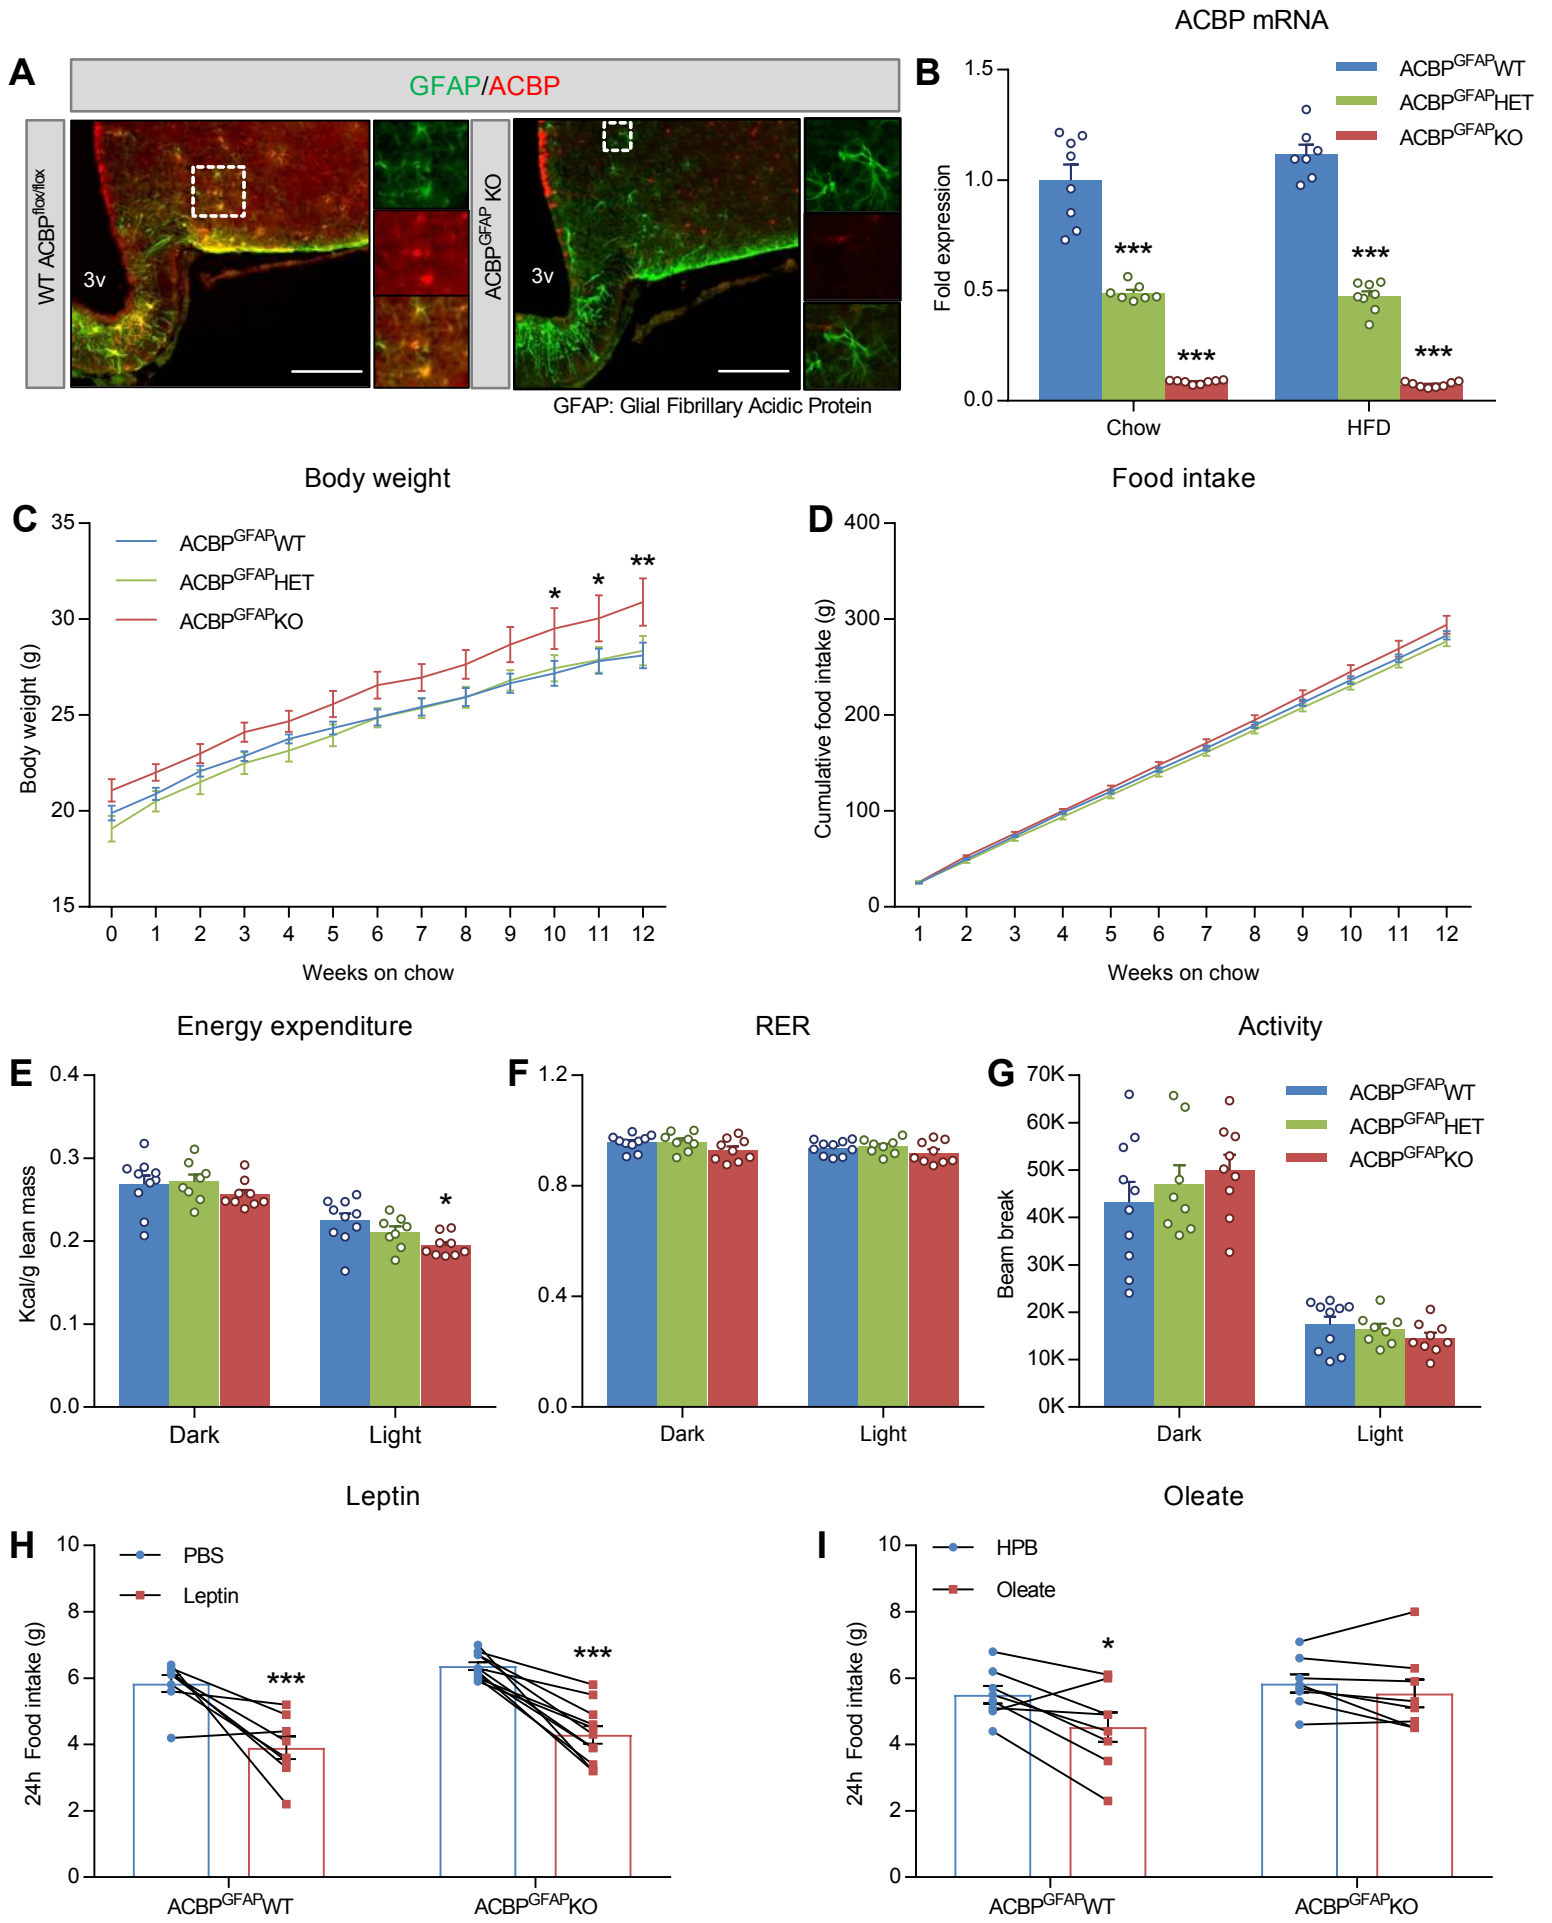

**Supplemental Figure 3: Pan-brain astroglial ACBP invalidation in male and female mice on a high-fat diet. A and D- RER, B and E- locomotor activity and, C and F- energy expenditure (normalized to lean mass) in male (N=8-15) (A-C) or female (N=6-7) (D-F)  $ACBP^{GFAP}$  WT, HET and KO mice (backcrossed BL/6J) fed with a HFD during 16 weeks. G- Weight of intraperitoneal and subcutaneous fat pads of  $ACBP^{GFAP}$  WT, HET and KO female mice, N=6-7 (backcrossed BL/6J). H- Body weight gain of  $ACBP^{flox/flox}$ ,  $ACBP^{GFAP}$  HET and KO female mice on a mixed BL/6J-Bom genetic background fed with a HFD during 12 weeks. \*  $p < 0.05$ , \*\*  $p < 0.01$  compared to control littermates, One-Way ANOVA with Bonferroni post hoc test (A-G). \*\*  $p < 0.01$  Two-way ANOVA with Bonferroni post hoc test compared to controls, N=6-9 (H).**

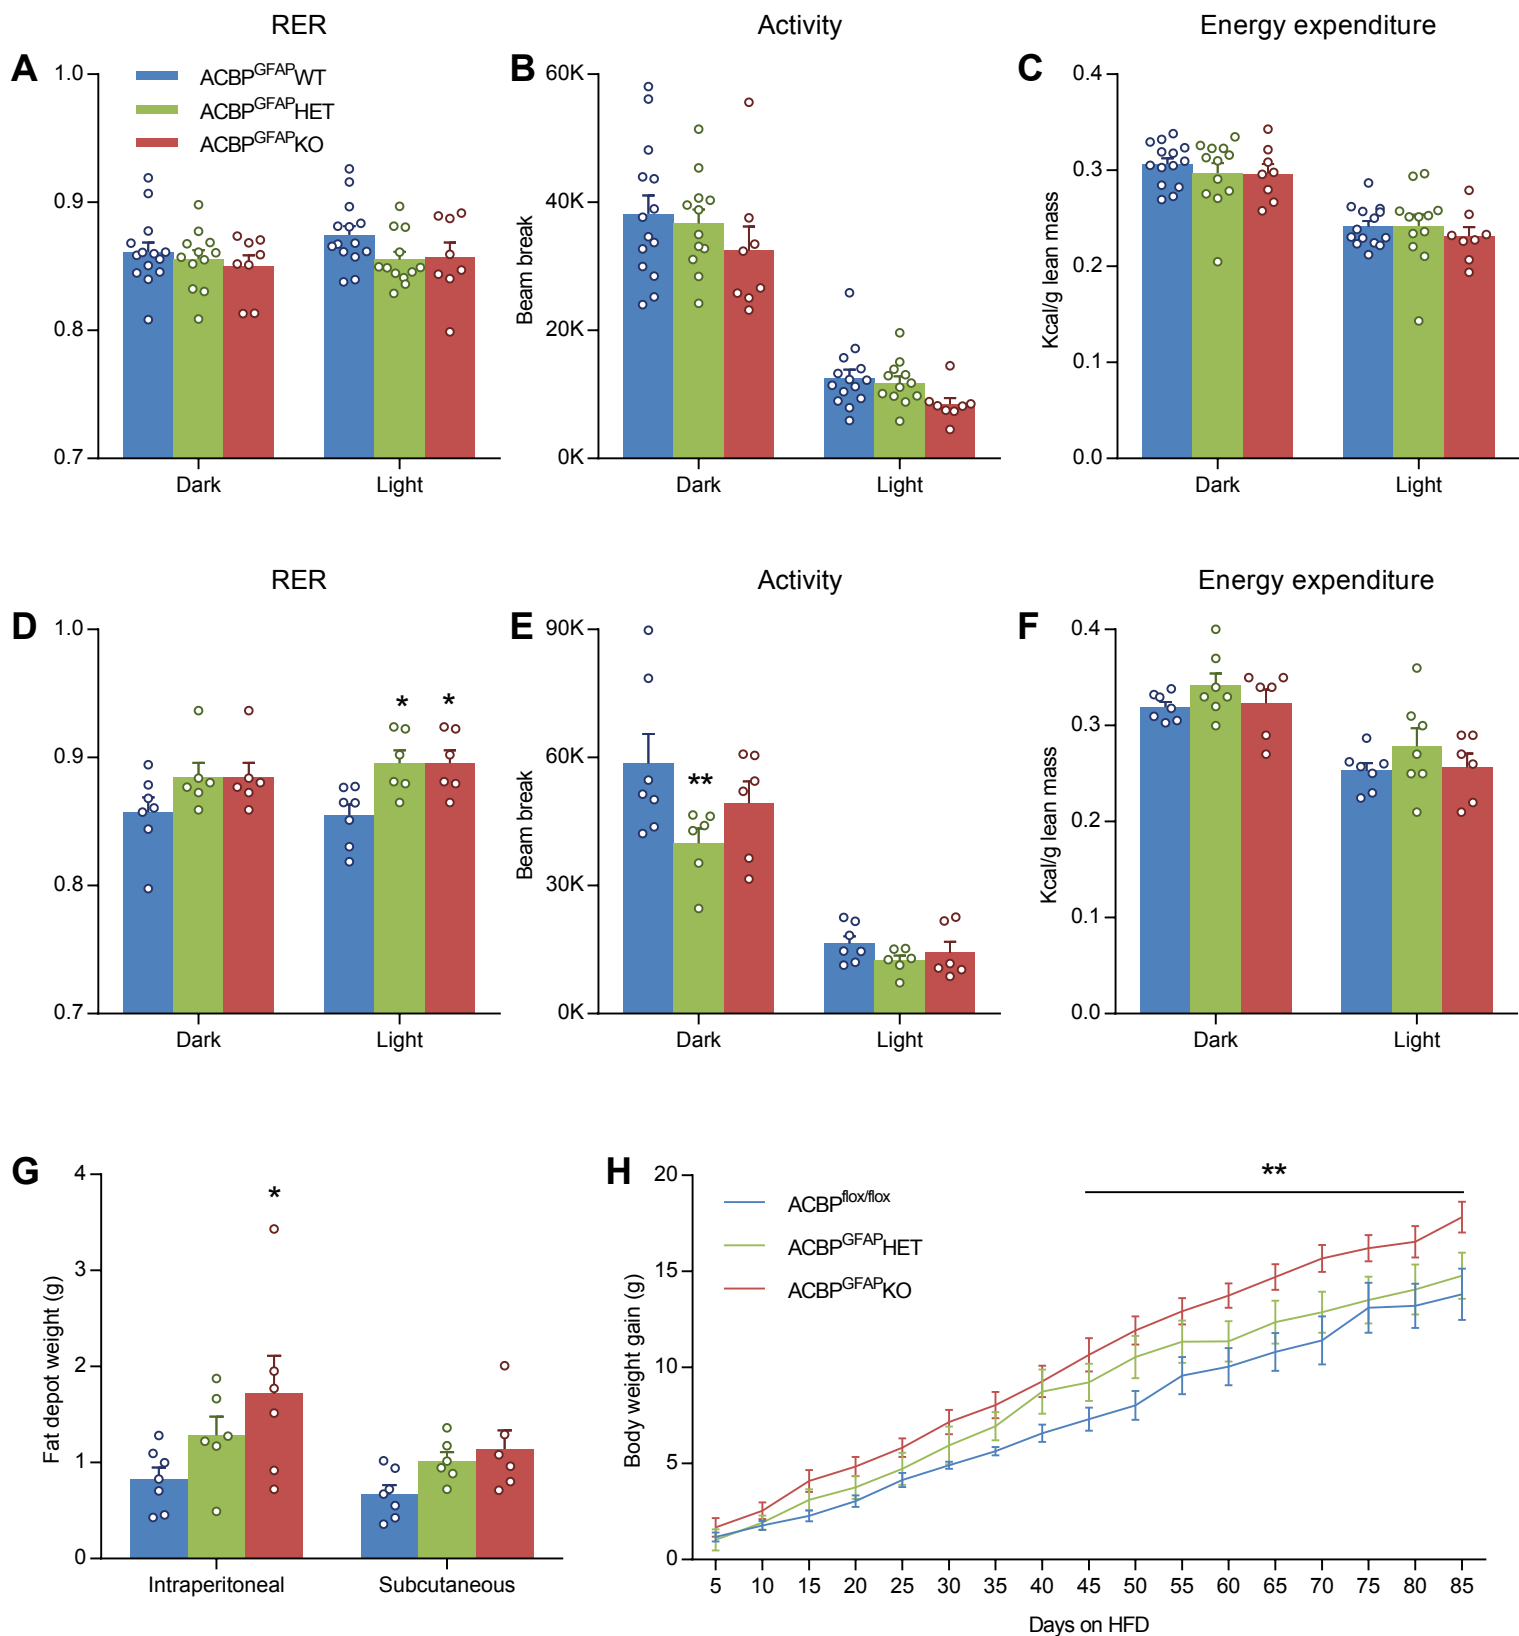

**Supplemental Figure 4: ACBP invalidation in Nkx2.1 neural cells.** **A-** Immunostaining of ACBP (green) and GFAP (red) in the hypothalamus of *ACBP<sup>flox/flox</sup>* (WT) and *ACBP<sup>Nkx2.1</sup>* KO male mice. **B-** *Acbp* expression measured by qPCR in ARC microdissections from *ACBP<sup>flox/flox</sup>*, *ACBP<sup>Nkx2.1</sup>* HET and KO mice. \*\*\*  $p < 0.001$  compared to controls, One-Way ANOVA with Bonferroni post hoc test, N=6. **C-** Body weight gain and **D-** cumulative food intake in *ACBP<sup>flox/flox</sup>*, *ACBP<sup>Nkx2.1</sup>* HET and KO male and female mice (mixed BL/6J-Bom background) fed with a HFD during 12 weeks. N=7-9.

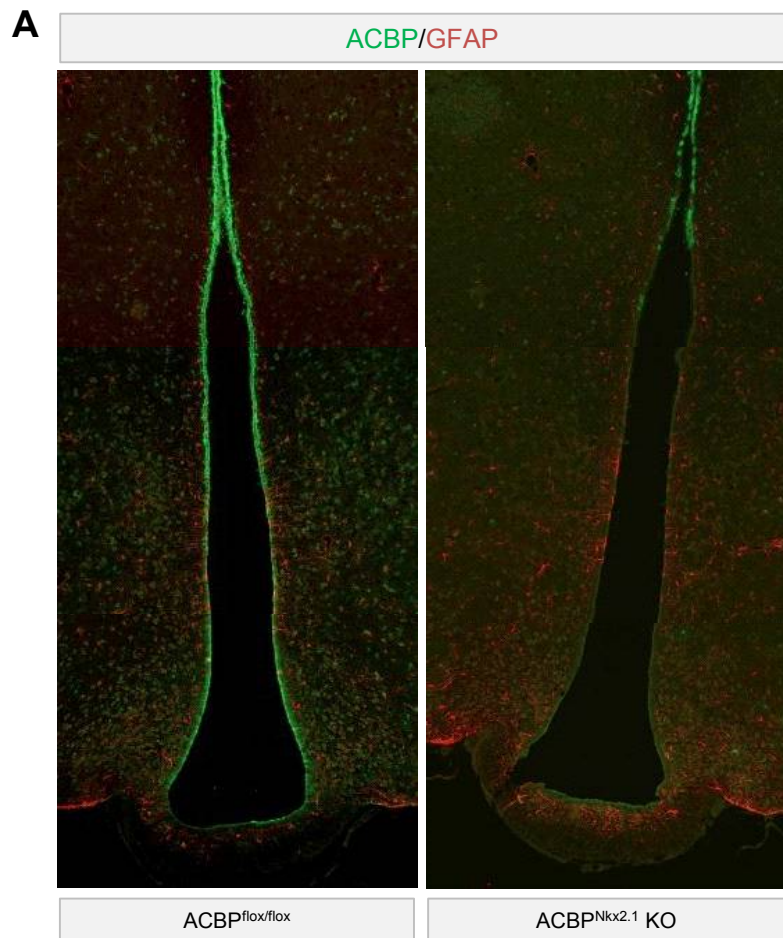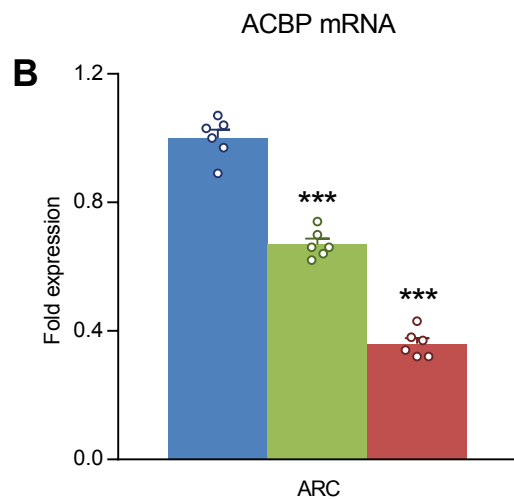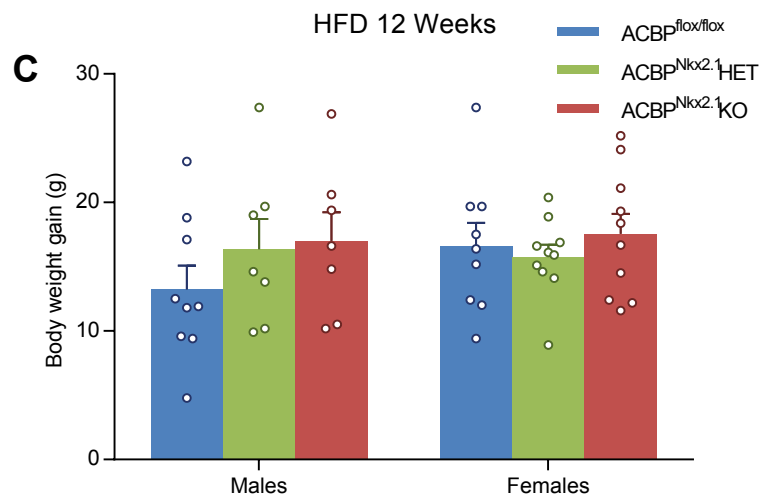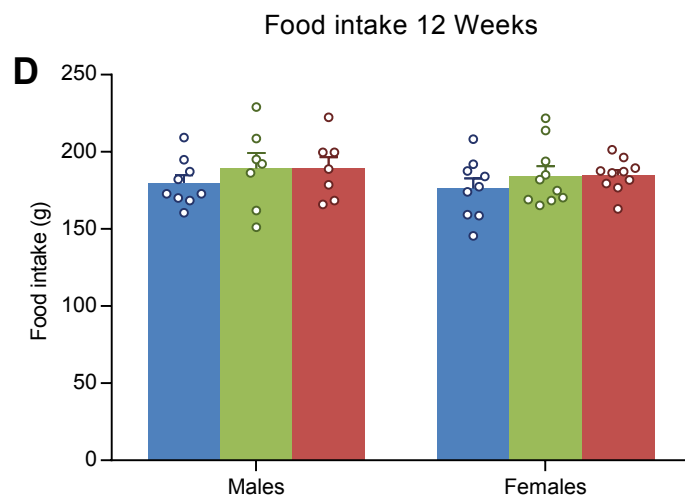



**Supplemental Figure 5: Modulation of neuronal activity by ODN and ODN GPCR.** Representative cell-attached recording of **A-** POMC or **B-** non-POMC neuron in response to 2 nM cOP. **C-** Quantification of AP frequency of non-POMC neurons in response to 2 nM cOP, N=12 neurons from 3 mice. **D-** Representative bright-field image of dissociated mediobasal hypothalamic cells in culture, scale bar represents 40  $\mu$ m. Representative  $\text{Ca}^{2+}$  imaging traces from dissociated neurons treated with 1 nM ODN in **E-** absence or **F-** presence of  $\text{cdLOP}$  ODN receptor antagonist (10 nM). **G-** Quantification of ODN response intensity (AUC) with or without  $\text{cdLOP}$  (ODN: N=36 ODN responsive / 425 total cells; ODN +  $\text{cdLOP}$ : N=17 ODN responsive/ 455 total cells), 3 independent cultures from 6 animals, \*  $p < 0.05$ , Student's  $t$ -test. **H-** Representative trace and **I-** quantification of AP frequency of POMC neurons in the presence of GABA<sub>A</sub> inhibitors (gabazine 5  $\mu$ M and picrotoxin 100  $\mu$ M) in response to ODN application (1 nM) with or without  $\text{cdLOP}$  (10 nM). \*  $p < 0.05$  compared to control (GZ + PTX) and  $\text{cdLOP}$ , One-way ANOVA repeated measures with Bonferroni post hoc test, N=10 neurons from 3 mice.

Methods: Panel **A**, POMC-neurons were recorded from POMC-eGFP mice as detailed in the method section. Non-POMC (panels **B** and **C**) and POMC neurons (panels **H** and **I**) were recorded in brain slices from 6 weeks old POMC-Cre male mice (Tg(Pomc1-cre)16Low/J, JAX Stock #005965, Jackson Laboratory, USA) bilaterally injected in the ARC (stereotaxic coordinates: antero-posterior -1.1 mm from bregma; lateral  $\pm$  0.3 mm; dorso-ventral -5.8 mm) with an AAV-DIO-mCherry (350 nL rAVV8-hSyn-DIO-mCherry,  $3.7 \times 10^9$  GC/ $\mu$ L, UNC Vector, Lot #AV4981E), 2-3 weeks before performing electrophysiological recordings as described in the method section. To decrease the chance of recording false negative cells (POMC neurons not infected by the AAV), we recorded non-fluorescent neurons (N=12) surrounded by POMC-mCherry positive neurons (panels **B** and **C**).

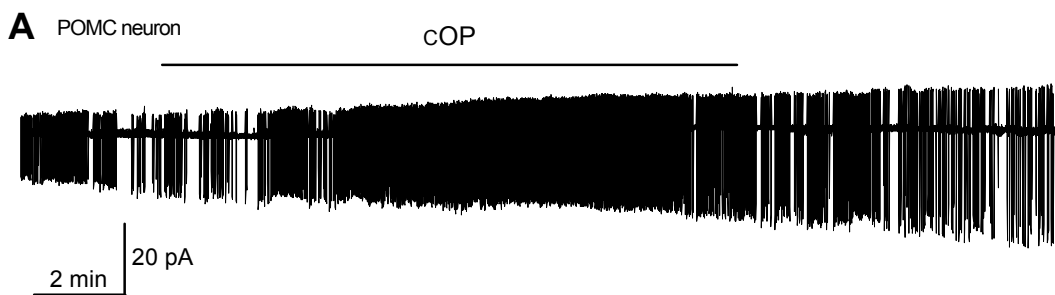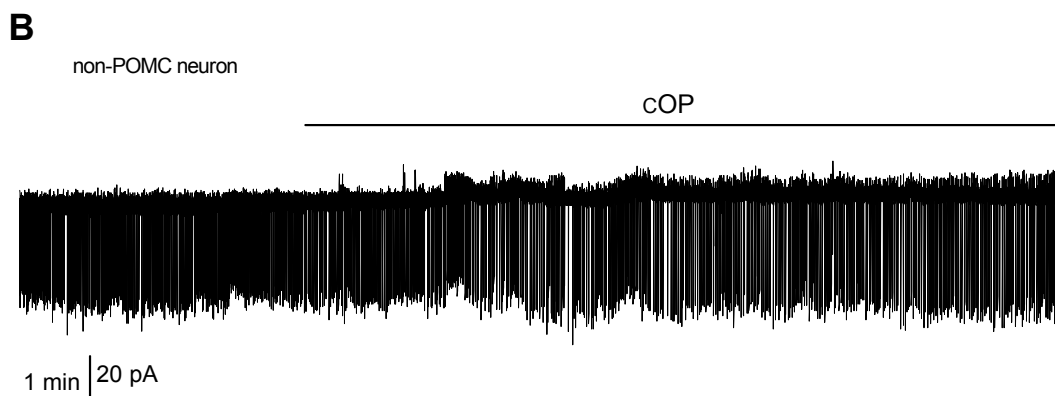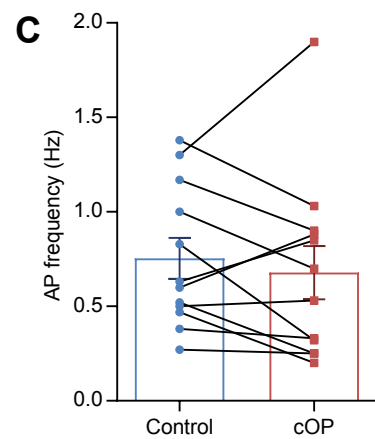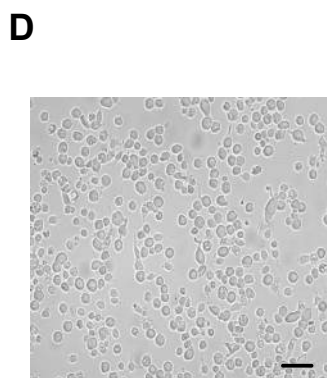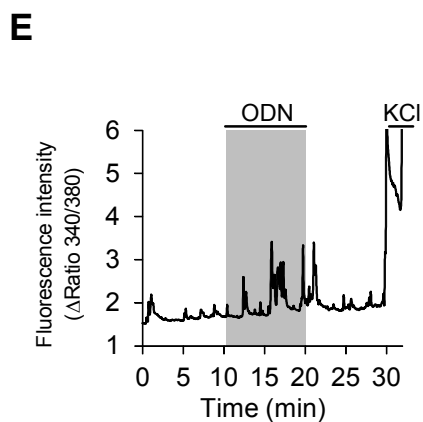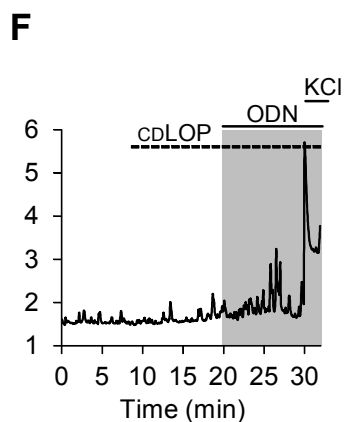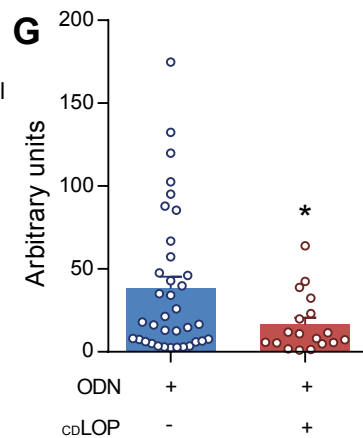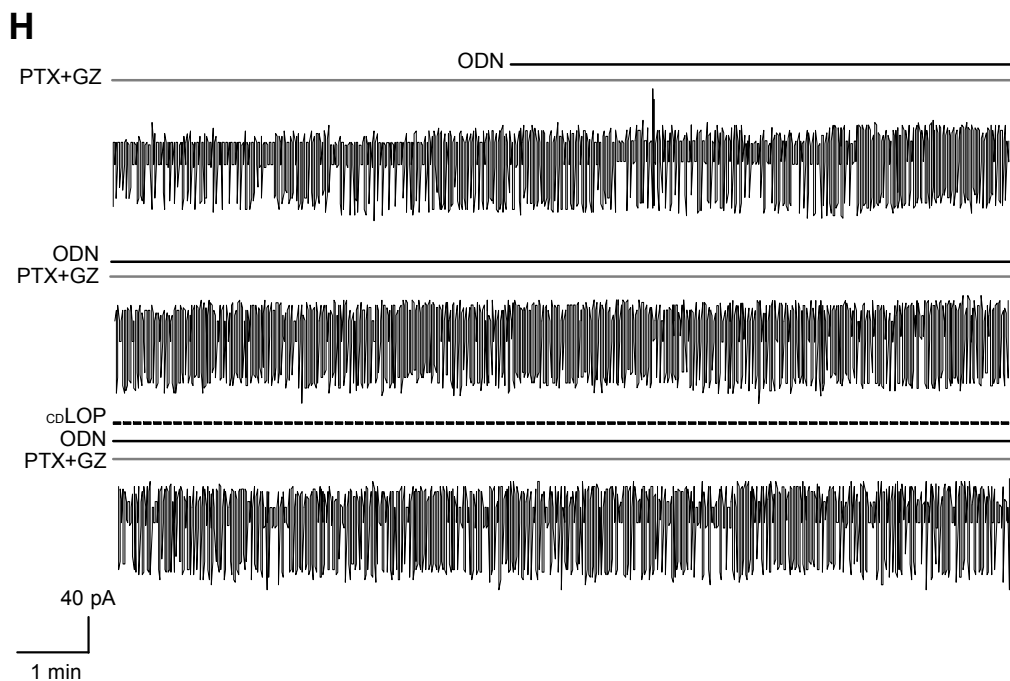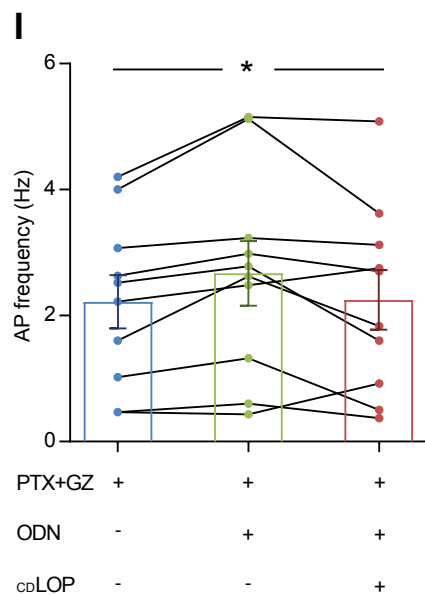

Supplement: sd1 [file 1]
